# Supplementary material for: The exchange between anions and cations induced by coupled plasma and thermal annealing treatment for room-temperature ferromagnetism
Source: Royal Society of Chemistry journal article supplement (doi:10.1039/d2cp00379a), 2022-01-01
Supplement: d2cp00379a1.pdf [file d2cp00379a1.pdf]

## Supporting Information

# The exchange between anions and cations induced by coupled plasma and thermal annealing treatment for room-temperature ferromagnetism

Shuyi Wu<sup>a</sup>, Jinlei Yao<sup>a</sup>, Ju Gao<sup>a,d\*</sup>, Yun Shan<sup>b\*</sup>, and Lizhe Liu<sup>c</sup>

<sup>a</sup>*Jiangsu Key Laboratory of Micro and Nano Heat Fluid Flow Technology and Energy Application, School of Physical Science and Technology, Suzhou University of Science and Technology, Suzhou, 215009, China*

<sup>b</sup>*Key Laboratory of Advanced Functional Materials of Nanjing, Nanjing Xiaozhuang University, Nanjing 211171, People's Republic of China*

<sup>c</sup>*National Laboratory of Solid State Microstructures and School of Physics, Nanjing University, Nanjing 210093, PR China*

<sup>d</sup>*School for Optoelectronic Engineering, Zaozhuang University, Shandong 277160, People's Republic of China*

\*Corresponding authors. E-mail: jugao@hku.hk (J. Gao) or yshan@njxzc.edu.cn; (Y. Shan)

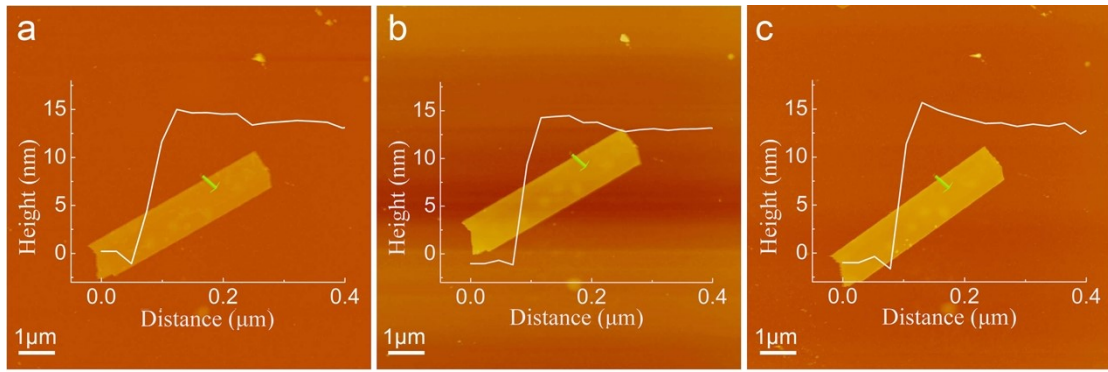

Fig. S1 AFM image of the (a) pristine, (b) plasma-treated and (c) plasma-annealing-treated ReS<sub>2</sub> films. Inset: Height profile along the yellow line indicating the layer thickness.

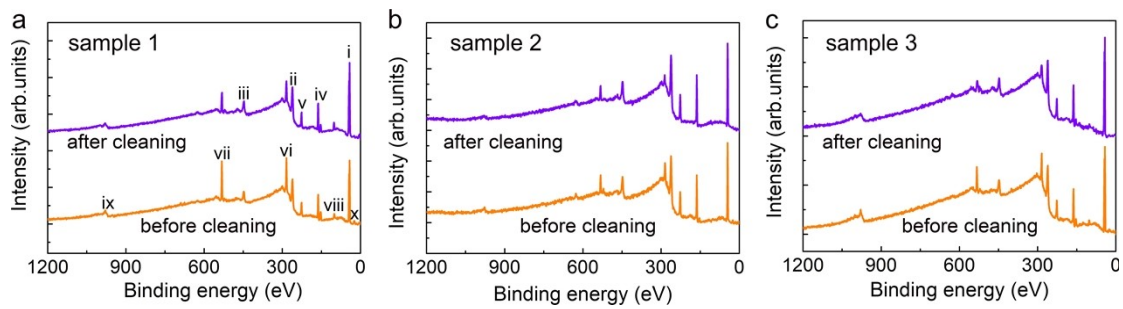

Fig. S2 XPS survey spectra shown from 0 to 1200 eV of the (a) pristine, (b) plasma-treated and (c) plasma-annealing-treated  $\text{ReS}_2$  films before and after the sample cleaning.
